# Supplementary material
Source: publisher figshare collection journal article supplement (https://acs.figshare.com/ndownloader/files/3748105)
Supplement: Supplementary file 1 [file 3748105]

## Supporting Information

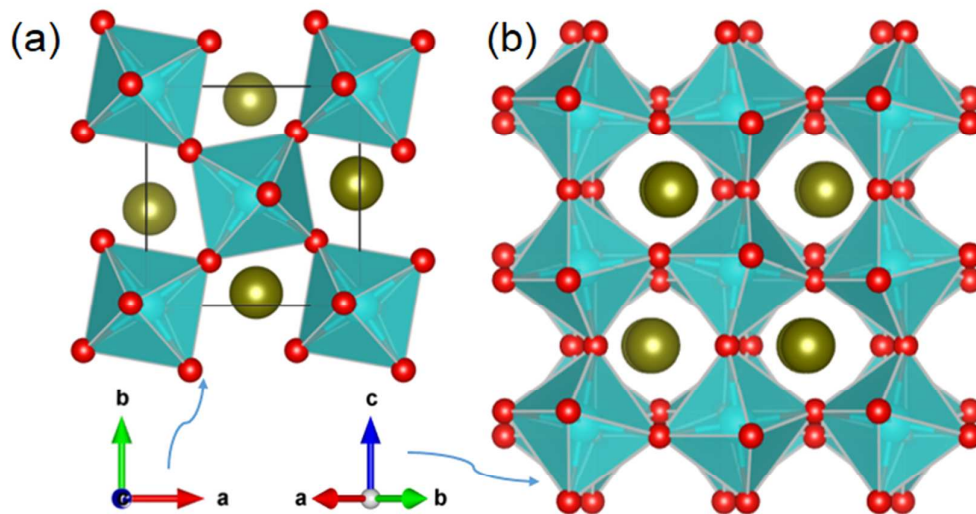

**Figure S1.** Structure of distorted  $\text{BaZrS}_3$ : (a) top view along the  $[001]$  direction and (b) side view along the  $[110]$  direction. Yellow, blue and red balls indicate Ba, Zr and S atoms, respectively.

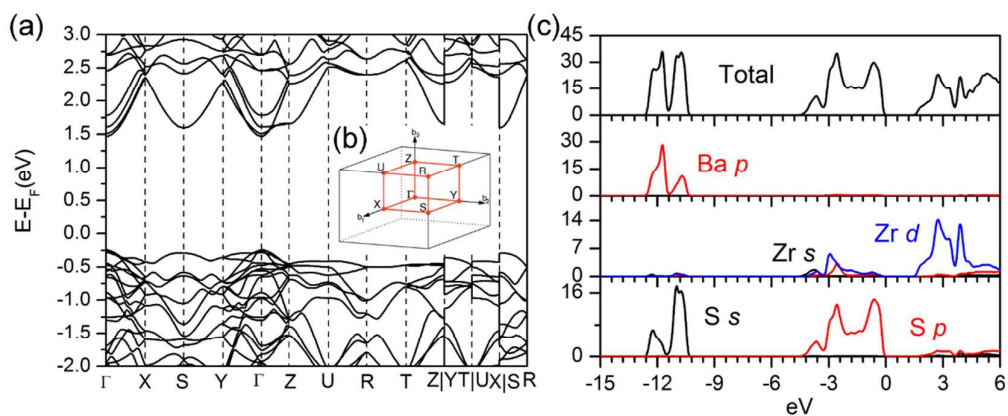

**Figure S2.** GGA+ $U$  calculated band structure and density of states (DOS) for  $\text{BaZrS}_3$ .

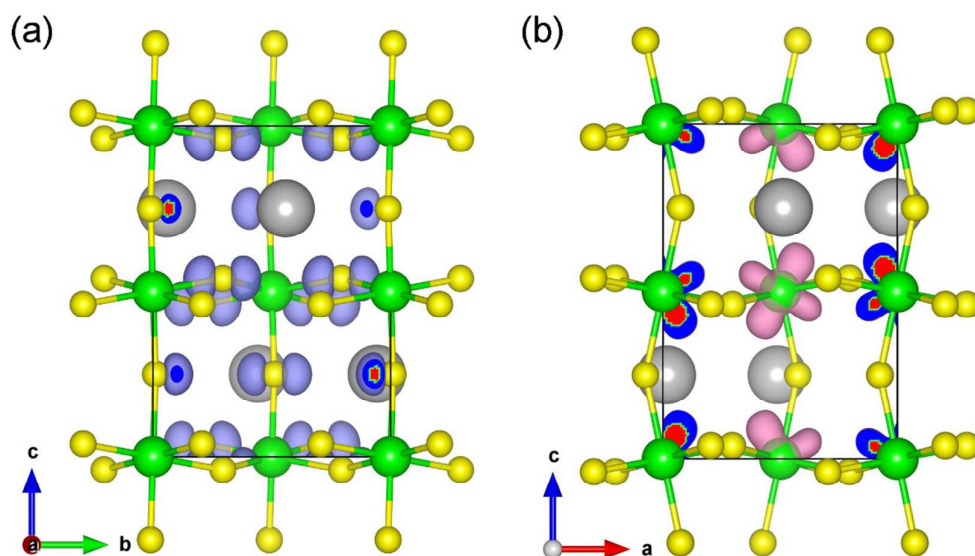

**Figure S3.** Calculated BaZrS<sub>3</sub> charge density map for (a) VBM, blue color and (b) CBM, pink color. Ba, Zr and S atoms are represented by grey, green and yellow balls, respectively.

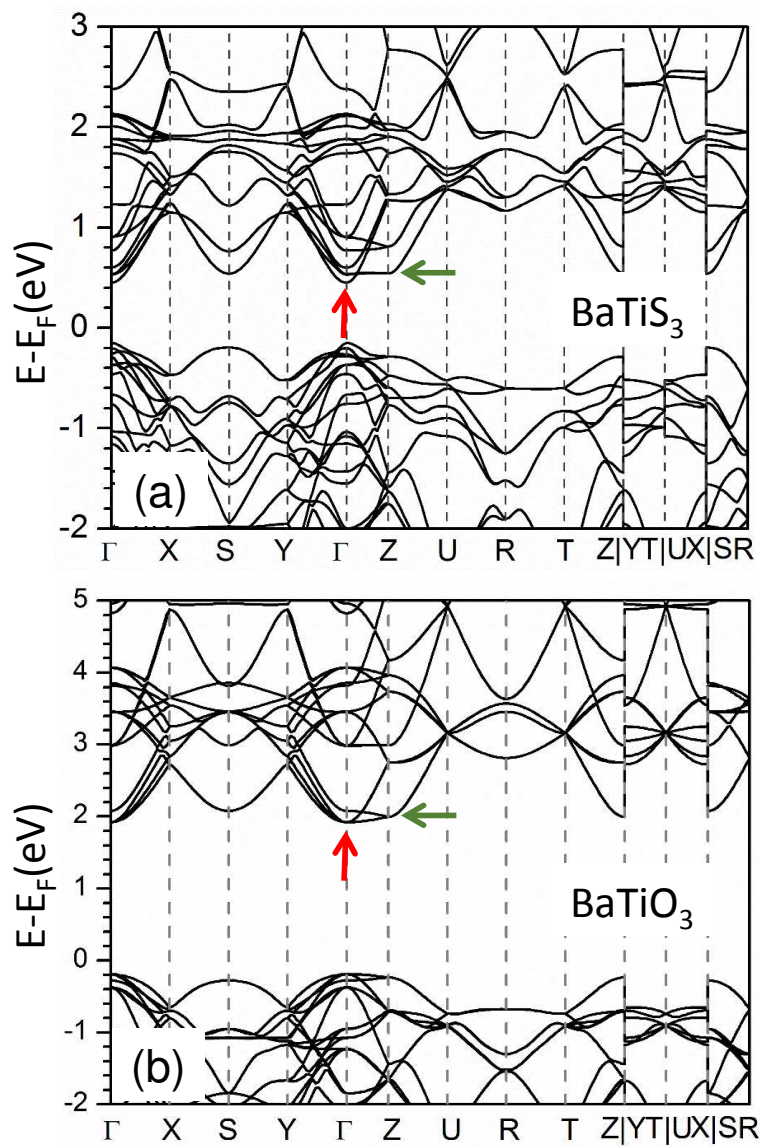

**Figure S4.** Calculated band structures of (a)  $\text{BaTiS}_3$  and (b)  $\text{BaTiO}_3$  perovskites.

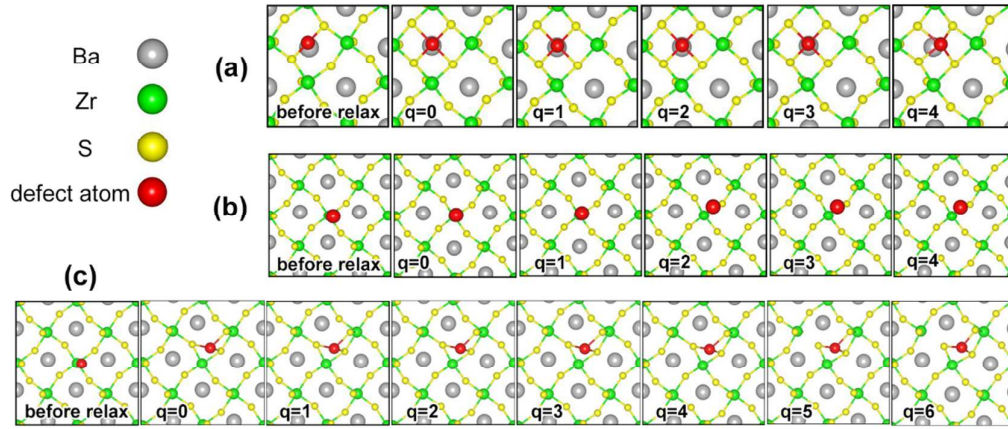

**Figure S5.** Configurations of three defects with multiple charge states before and after ionic relaxation: (a)  $\text{Zr}_i$ , (b)  $\text{Ba}_S$  and (c)  $\text{Zr}_S$ .  $q$  equals positive charge state. Red color atoms are the defect atoms.

**Table S1.** Comparison of GGA+U and HSE06 calculated bandgaps.

|              |                              | HSE06 | GGA+U                           |
|--------------|------------------------------|-------|---------------------------------|
| Bandgap (eV) | $\text{BaZrS}_3$ -perovskite | 1.72  | 1.62 ( $U_{\text{eff}}=4.0$ eV) |
|              |                              |       | 1.76 ( $U_{\text{eff}}=4.5$ eV) |
|              |                              |       | 1.87 ( $U_{\text{eff}}=5.0$ eV) |
|              | $\text{BaTiS}_3$ -perovskite | 0.53  | 0.41 ( $U_{\text{eff}}=3$ eV)   |
|              |                              |       | 0.60 ( $U_{\text{eff}}=4$ eV)   |
|              |                              |       | 0.76 ( $U_{\text{eff}}=5$ eV)   |

**Table S2.** Calculated PBE total energies of three  $\text{BaTiS}_3$  phases. The energies are referred to that of the hexagonal phase.

| Phase                     | Hexagonal phase | Perovskite phase | Needle-like phase |
|---------------------------|-----------------|------------------|-------------------|
| Total Energy (eV/formula) | 0               | 0.237            | 0.250             |
